# Supplementary material for: Exceptional low-temperature activity of a perovskite-type AlCeO3 solid solution-supported Ni-based nanocatalyst towards CO2 methanation
Source: Royal Society of Chemistry journal article supplement (doi:10.1039/d1cy00340b), 2021-01-01
Supplement: d1cy00340b1.pdf [file d1cy00340b1.pdf]

## Supplementary material

### **Exceptional low-temperature activity of perovskite-type AlCeO<sub>3</sub> solid solution supported Ni-based nanocatalyst towards CO<sub>2</sub> methanation**

Jingyi Zhang, Baojin Ren, Guoli Fan, Lan Yang, Feng Li\*

*State Key Laboratory of Chemical Resource Engineering, Beijing University of Chemical Technology, Beijing 100029, China.*

Corresponding authors: Email: lifeng@mail.buct.edu.cn.

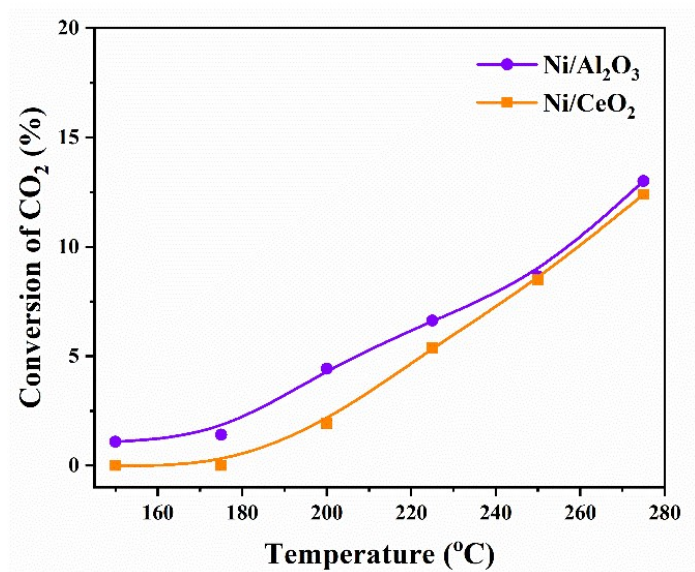

**Fig.S1** The change in the CO<sub>2</sub> conversion with the reaction temperature over Ni/Al<sub>2</sub>O<sub>3</sub> and Ni/CeO<sub>2</sub> reference catalysts.

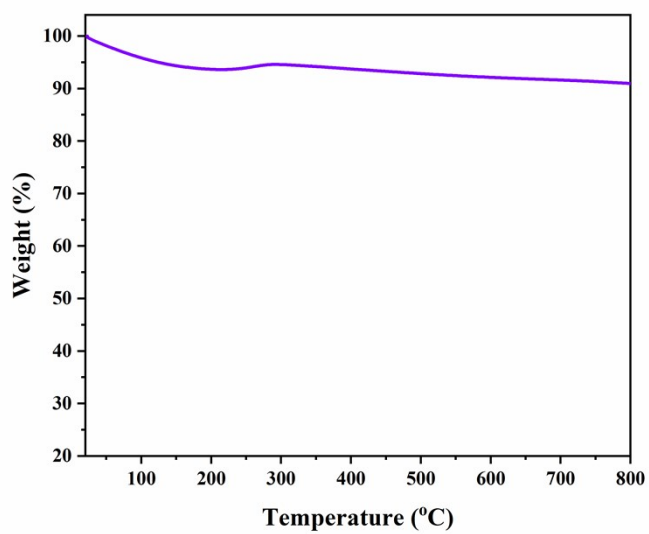

**Fig.S2** TG curve of used Ni/AlCeO-0.2 catalyst after 55h test.

**Table S1** Surface basicity of different Ni-based samples.

| Samples      | Specific basicity (CO <sub>2</sub> mmol/g) |         |          |         |
|--------------|--------------------------------------------|---------|----------|---------|
|              | Total basic sites                          | WB site | MSB site | SB site |
| Ni/AlCeO-0   | 1.0                                        | 0.049   | 0.732    | 0.219   |
| Ni/AlCeO-0.1 | 1.165                                      | 0.073   | 0.898    | 0.194   |
| Ni/AlCeO-0.2 | 1.211                                      | 0.117   | 0.900    | 0.193   |
| Ni/AlCeO-0.4 | 1.221                                      | 0.102   | 0.900    | 0.219   |

**Table S2** Data of H<sub>2</sub>-TPD profiles for different Ni-based samples.

| Samples                           | H <sub>2</sub> uptake | H <sub>Ni</sub> <sup>a</sup> | H <sub>sp</sub> <sup>b</sup> |
|-----------------------------------|-----------------------|------------------------------|------------------------------|
|                                   | (mmol/g)              | (mmol/g)                     | (mmol/g)                     |
| Ni/AlCeO-0                        | 0.614                 | 0.458                        | 0.139                        |
| Ni/AlCeO-0.1                      | 0.648                 | 0.504                        | 0.117                        |
| Ni/AlCeO-0.2                      | 0.627                 | 0.505                        | 0.108                        |
| Ni/AlCeO-0.4                      | 0.622                 | 0.502                        | 0.104                        |
| Ni/Al <sub>2</sub> O <sub>3</sub> | 0.130                 | 0.082                        | 0.023                        |
| Ni/CeO <sub>2</sub>               | 0.020                 | 0.017                        | --                           |

<sup>a</sup> Desorption in the range of 100–500 °C. <sup>b</sup> Desorption in the range of 500–900°C.

**Table S3** Comparison of the results of CO<sub>2</sub> methanation over different metal catalysts.

| Samples                                                                             | CO <sub>2</sub> /H <sub>2</sub><br>atomic ratio | GHSV<br>(mL·g <sup>-1</sup> ·h <sup>-1</sup> ) | Temp.<br>(°C) | Conv.<br>(%) | TOF<br>(h <sup>-1</sup> ) | Refs      |
|-------------------------------------------------------------------------------------|-------------------------------------------------|------------------------------------------------|---------------|--------------|---------------------------|-----------|
| Ni-Ce-Al <sub>2</sub> O <sub>3</sub>                                                | 1:3.5                                           | 9000                                           | 300           | 75           | n.a                       | [13]      |
| Ni/Al <sub>2</sub> O <sub>3</sub> -ZrO <sub>2</sub>                                 | 1:4                                             | 6000                                           | 300           | 77           | n.a                       | [23]      |
| Ni/CeO <sub>2</sub> -ZrO <sub>2</sub>                                               | 1:4                                             | 21000                                          | 350           | 80           | n.a                       | [30]      |
| NiAl-MO/CeO <sub>2</sub>                                                            | 1:4                                             | 2400                                           | 250           | 91           | n.a                       | [31]      |
| Ni/ZSM-5                                                                            | 1:4                                             | 2400                                           | 400           | 70           | 27.3 <sup>a</sup>         | [56]      |
| Ni@UiO-66                                                                           | 1:5.2                                           | 1650                                           | 350           | 48           | n.a                       | [57]      |
| Ni@MOF-5                                                                            | 1:4                                             | 2000                                           | 280           | 47           | n.a                       | [58]      |
| NiAl-LDH                                                                            | 1:4                                             | 30000                                          | 250           | 50           | n.a                       | [59]      |
| Ni/CeO <sub>2</sub>                                                                 | 1:4                                             | 10000                                          | 300           | 87           | n.a                       | [60]      |
| Ni/SiO <sub>2</sub> -Al <sub>2</sub> O <sub>3</sub> -La <sub>2</sub> O <sub>3</sub> | 1:5                                             | 55000                                          | 300           | 83           | n.a                       | [61]      |
| Ni-Cr <sub>2</sub> O <sub>3</sub>                                                   | 1:3                                             | 18000                                          | 350           | 69           | n.a                       | [62]      |
| Ni/MIL-101                                                                          | 1:4                                             | 3000                                           | 300           | n.a          | 5.9 <sup>b</sup>          | [63]      |
| Ni-MgO/MgH <sub>2</sub>                                                             | 1:4                                             | 9600                                           | 300           | 85.2         | n.a.                      | [64]      |
| Ru/Al <sub>2</sub> O <sub>3</sub>                                                   | 1:4                                             | 1000                                           | 250           | 37           | n.a                       | [65]      |
| Ni/AlCeO <sub>3</sub> -0.2                                                          | 1:4                                             | 48000                                          | 200           | 83.2         | 18.2 <sup>c</sup>         | This work |

<sup>a</sup> calculated at 250 °C; <sup>b</sup> calculated at 300 °C; <sup>c</sup> calculated at 175 °C.
